# Supplementary material for: Low-dose TNF augments fracture healing in normal and osteoporotic bone by up-regulating the innate immune response
Source: PubMed Central journal article supplement (PMC4492816; doi:10.15252/emmm.201404487), 2015-03-14

# Supplemental Figure 2

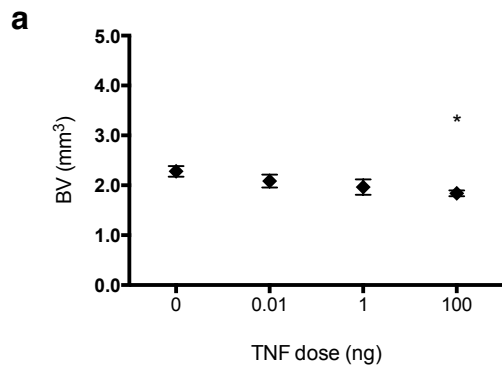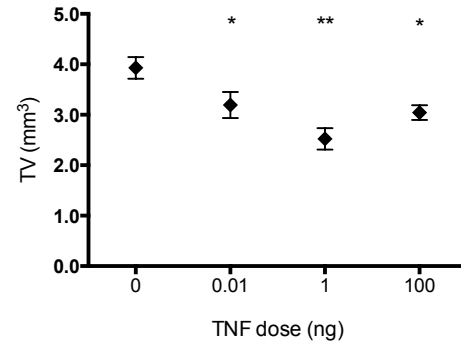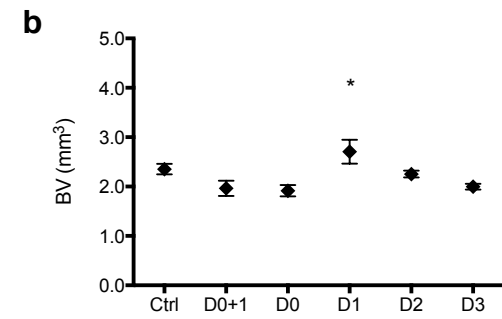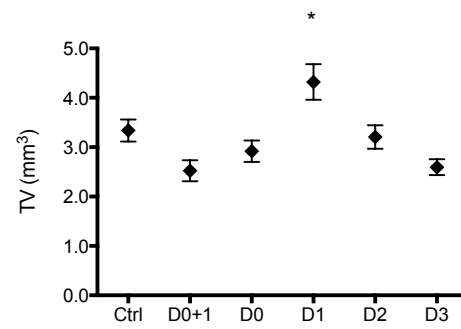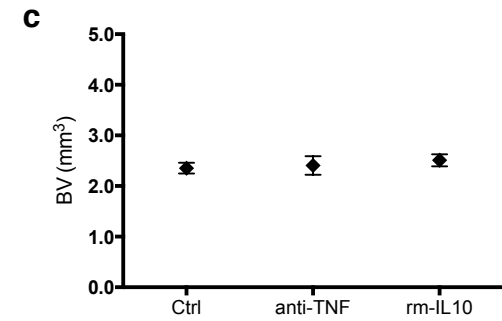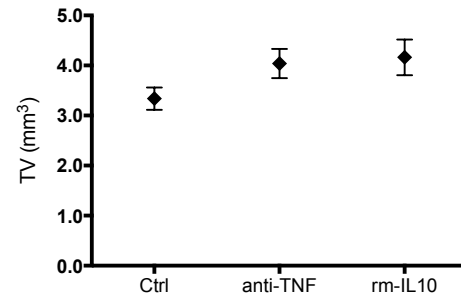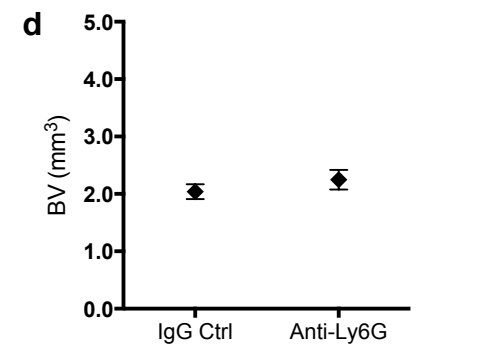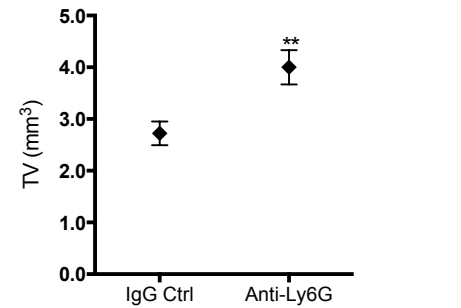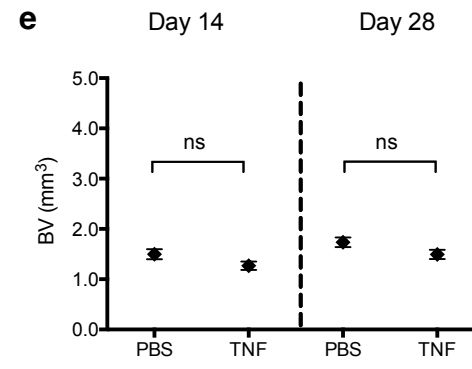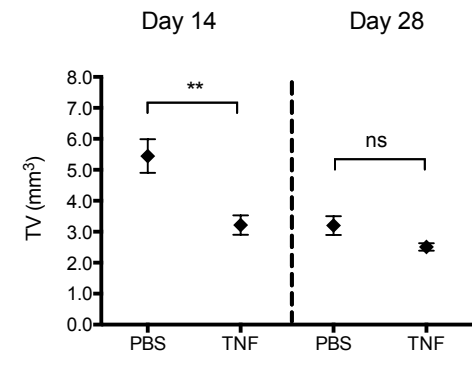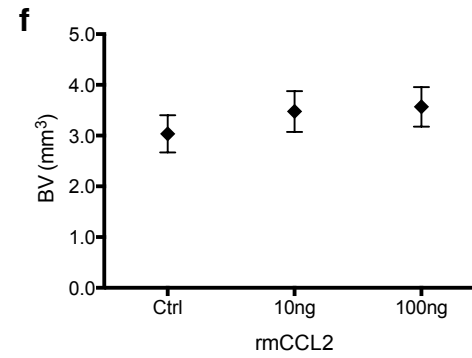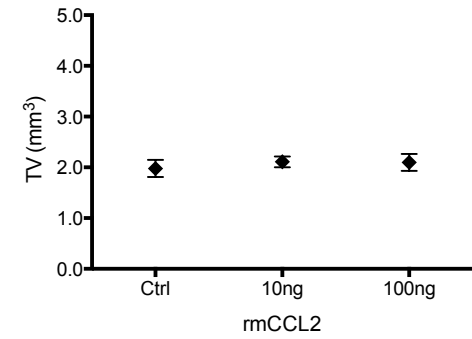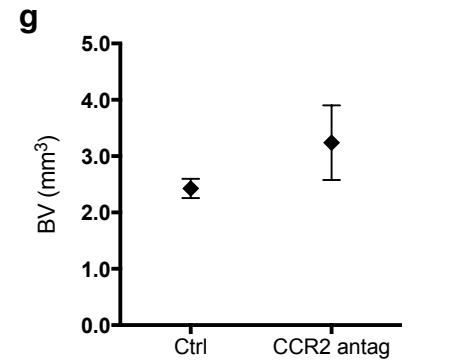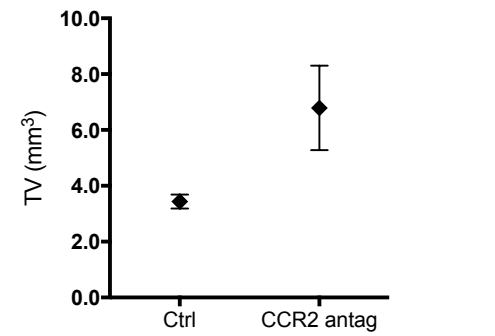

Supplement: emmm0007-0547-sd2.pdf [file emmm0007-0547-sd2.pdf]
